# Supplementary material for: Steric control over the formation of cis and trans bis-chelated palladium(ii) complexes using a new series of flexible N,P pyridyl–phosphine ligands
Source: Royal Society of Chemistry journal article supplement (doi:10.1039/b709032c), 2007-01-01
Supplement: b709032c.pdf [file b709032c.pdf]

**Steric control over the formation of *cis* and *trans* bischelated palladium(II) complexes using a new series of flexible *N,P* pyridyl-phosphine ligands**

**Deborah A. Clarke, Philip W. Miller, Nicholas J. Long,\* Andrew J. P. White**

*Department of Chemistry, Imperial College London, South Kensington, London, UK SW7 2AZ*

**Supporting Information — X-Ray Crystallography**

**Solid State Intermolecular Aspects of the Structures**

*Compound 7a* - The molecules pack to form centrosymmetric dimer pairs, one of the C(1) methylene protons in one molecule approaching the centroid of the N(4) pyridyl ring in its  $C_i$ -related counterpart with H $\cdots\pi$  2.95 Å and C–H $\cdots\pi$  121°, the H $\cdots\pi$  vector being inclined by *ca.* 77° to the ring plane.

*Compound 10* - Centrosymmetrically related pairs of molecules are linked by a  $\pi$ - $\pi$  stacking interaction between pyridyl rings with centroid $\cdots$ centroid and mean interplanar separations of *ca.* 3.77 and 3.54 Å respectively (the two rings are perfectly parallel as a consequence of the centre of symmetry). The other face of the pyridyl ring is approached by a cyclohexyl methylene proton with H $\cdots\pi$  3.52 Å and C–H $\cdots\pi$  170° (the H $\cdots\pi$  vector being inclined by *ca.* 53° to the ring plane), though this contact is somewhat long. These two interactions subtend an angle of *ca.* 160° at the pyridyl ring centroid.

*Compound 11* - Adjacent centrosymmetrically related molecules are again linked by a  $\pi$ - $\pi$  stacking interaction between pyridyl rings, the centroid $\cdots$ centroid and mean interplanar separations being *ca.* 3.85 and 3.37 Å respectively. The opposite face of the ring is approached by a *t*-butyl proton with H $\cdots\pi$  3.07 Å and C–H $\cdots\pi$  131°, the H $\cdots\pi$  vector being inclined by *ca.* 70° to the ring plane, and these two interactions subtend an angle of *ca.* 144° at the pyridyl ring centroid.

*Compound 12* – There is a short intermolecular C–H $\cdots\pi$  approach to the pyridyl ring from a methyl proton on C(9) of an adjacent molecule [H $\cdots\pi$  2.75 Å and C–H $\cdots\pi$  158°, the H $\cdots\pi$  vector being inclined by *ca.* 82° to the ring plane]. There are no strong contacts to the other side of the pyridyl ring, the closest approaches being from cyclohexyl methylene [H $\cdots\pi$  3.81 Å and C–H $\cdots\pi$  140°, the H $\cdots\pi$  vector being inclined by *ca.* 45° to the ring plane] and pyridyl C–H [H $\cdots\pi$  3.90 Å and C–H $\cdots\pi$  131°, the H $\cdots\pi$  vector being inclined by *ca.* 55° to the ring plane] protons in two different adjacent molecules .

In the structure of **14** one of the perchlorate anions and the included dichloromethane solvent molecule were found to be disordered, and in each case two orientations were identified.

**Fig. S1** The molecular structure of ligand **7a** (50% probability ellipsoids).

**Fig. S2** The molecular structure of complex **10** (50% probability ellipsoids).

**Fig. S3** The molecular structure of complex **11** (50% probability ellipsoids).

**Fig. S4** The molecular structure of **12** (50% probability ellipsoids).

**Fig. S5** The molecular structure of the dication in **14** (50% probability ellipsoids).

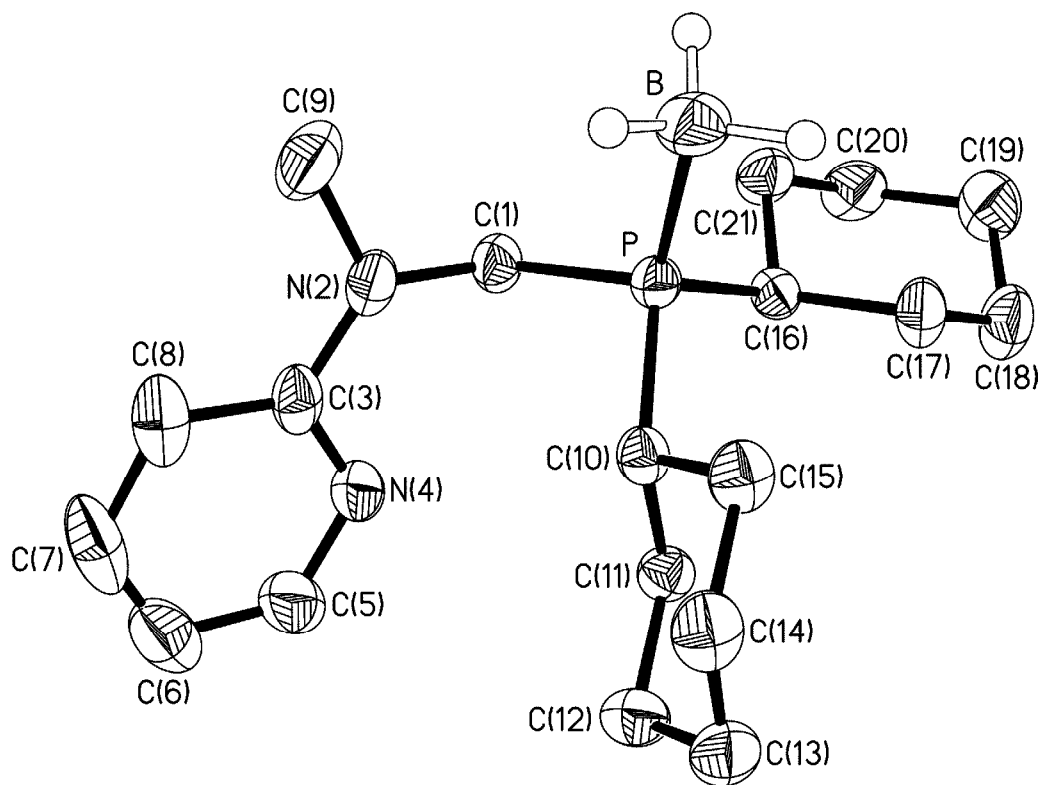

Fig. S1

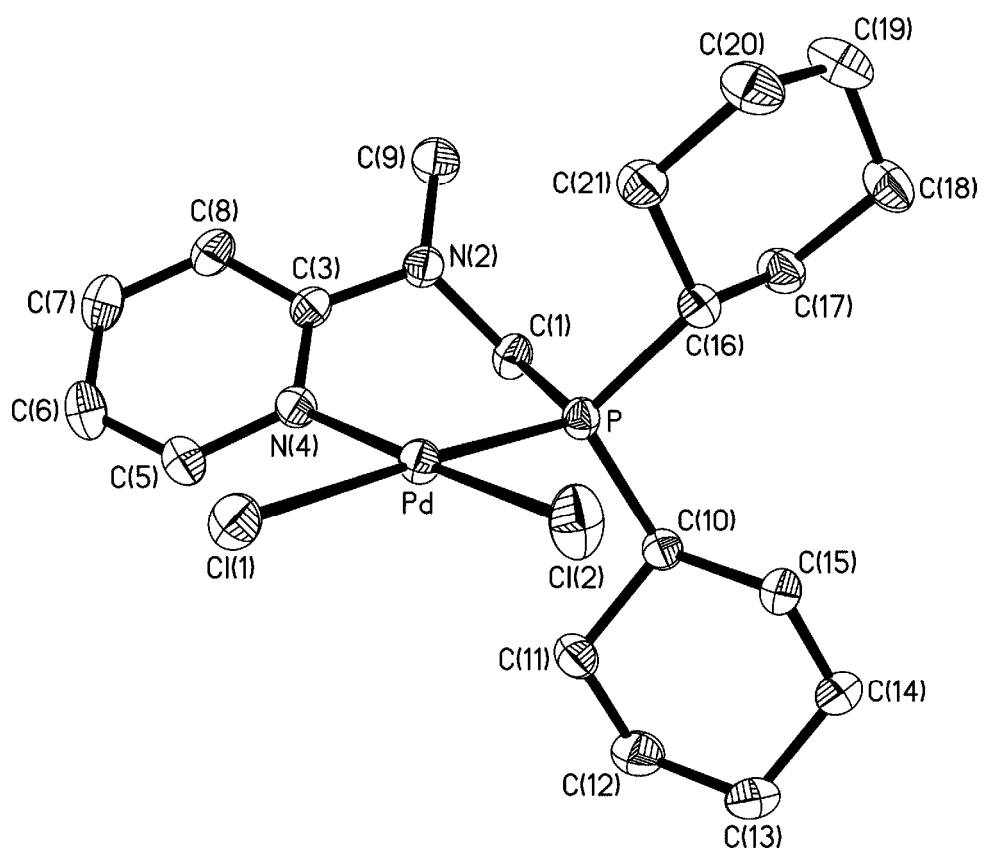

Fig. S2

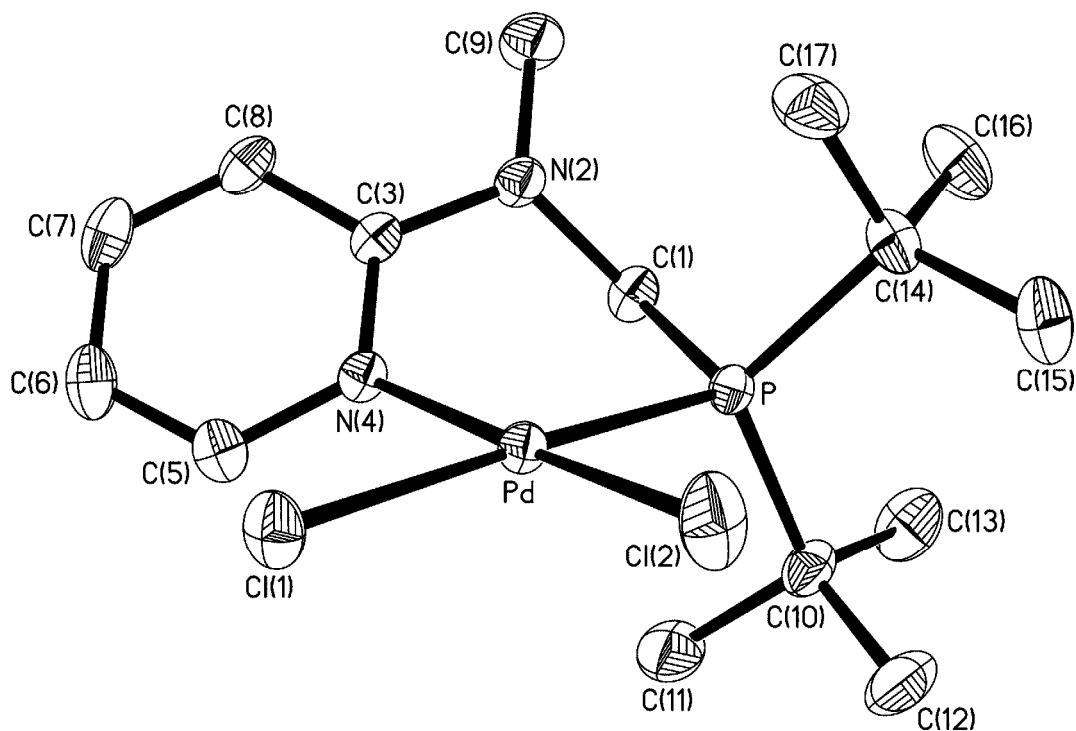

Fig. S3

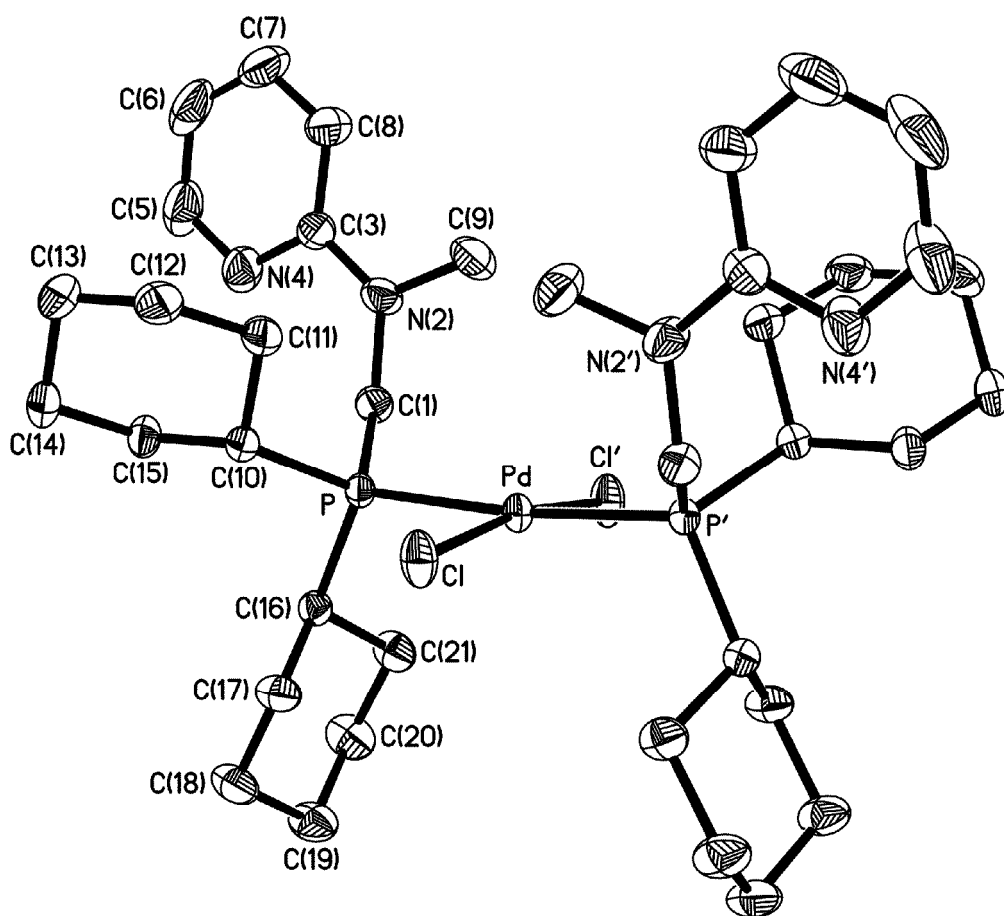

Fig. S4

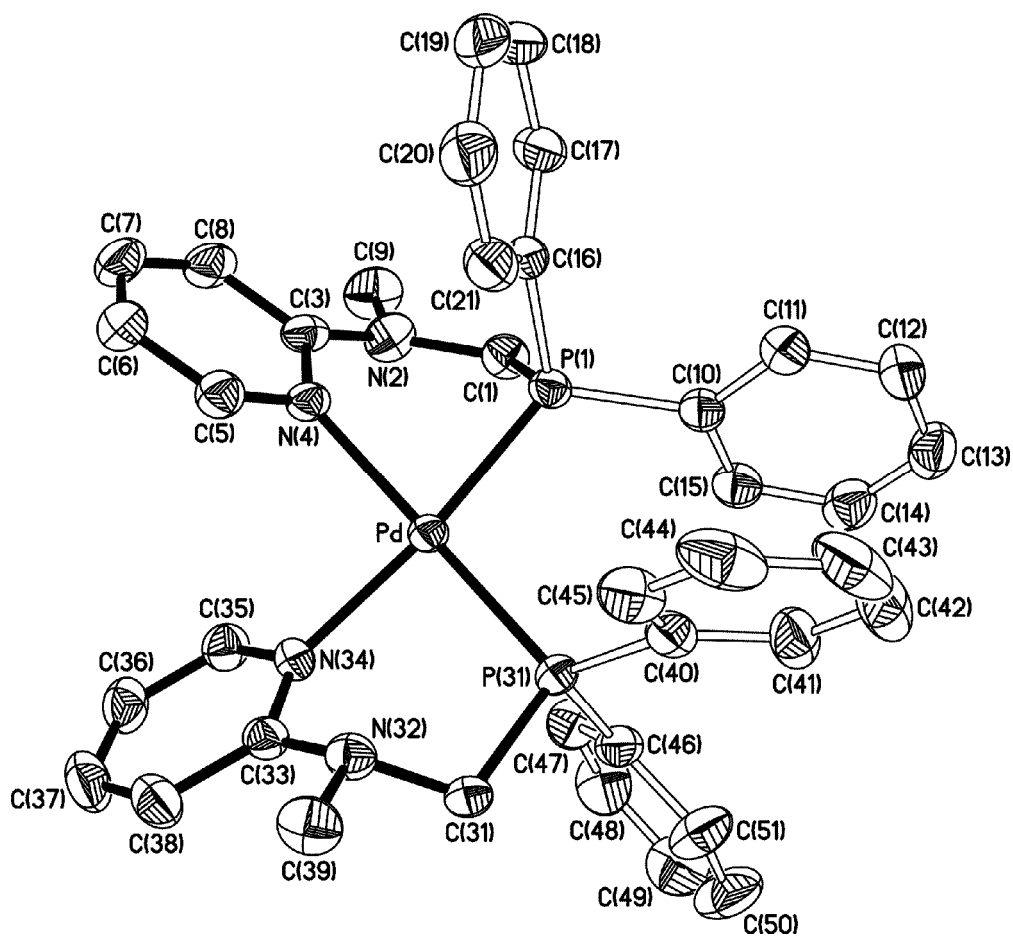

Fig. S5
